# Supplementary material for: A MPB-intensified tube microreactor system for continuous synthesis of Ag+ doped CdS quantum dots
Source: Royal Society of Chemistry journal article supplement (doi:10.1039/d5nr01114k), 2025-01-01

## Supplementary Information

### **A MPB intensified tube microreactor system for continuous synthesis of Ag<sup>+</sup> doped CdS quantum dots**

Chuwei Zhu,<sup>‡</sup> Yuxi Li,<sup>‡</sup> Tailei Hou, Xiaole Gu, Xinyuan Li,<sup>\*</sup> Le Sang<sup>\*</sup> and Jiatao Zhang<sup>\*</sup>

Beijing Key Laboratory of Construction-Tailorable Advanced Functional Materials and Green Applications, MOE Key Laboratory of Cluster Science, MIIT Key Laboratory of Medical Molecule Science and Pharmaceutical Engineering, School of Chemistry and Chemical Engineering, Beijing Institute of Technology, Beijing 100081, China.

<sup>‡</sup> These authors contributed equally to this work.

<sup>\*</sup>Corresponding author. Email address: zhangjt@bit.edu.cn (Jiatao Zhang), xinyuanli@bit.edu.cn (Xinyuan Li), lesang@bit.edu.cn (Le Sang).

Tel/Fax: 86-10-68918065

**Reaction conditions:**

- (1) Solution A: TBP dissolved in toluene (0.033 mL/L, **0.067 mol/L** or 0.134 mol/mL, 6 mL).
- (2) Solution B: As-prepared Ag<sub>2</sub>S QDs (3 mL), Cd(NO<sub>3</sub>)<sub>2</sub>·4H<sub>2</sub>O methanol solution (0.1 g·mL<sup>-1</sup>, 1mL), toluene (2 mL), OA (0.2 mL) and OAm (0.1 mL).
- (3) Flow rate of Solution A (Q<sub>A</sub>) and Solution B (Q<sub>B</sub>): **0.2 mL/min**, 0.4 mL/min, 0.7 mL/min, 1.0 mL/min, 2.0 mL/min, or 2.5 mL/min.
- (4) Internal particle size of MPB: 1.2 mm, **2.0 mm**, 2.5 mm or 3.0 mm.
- (5) Length of MPB: 13 cm or **18 cm**.
- (6) Reaction temperature: 40 °C, 50 °C, 60 °C or **70 °C**.

**Figure. S1**

The structural photo of the 13 cm long MPB.

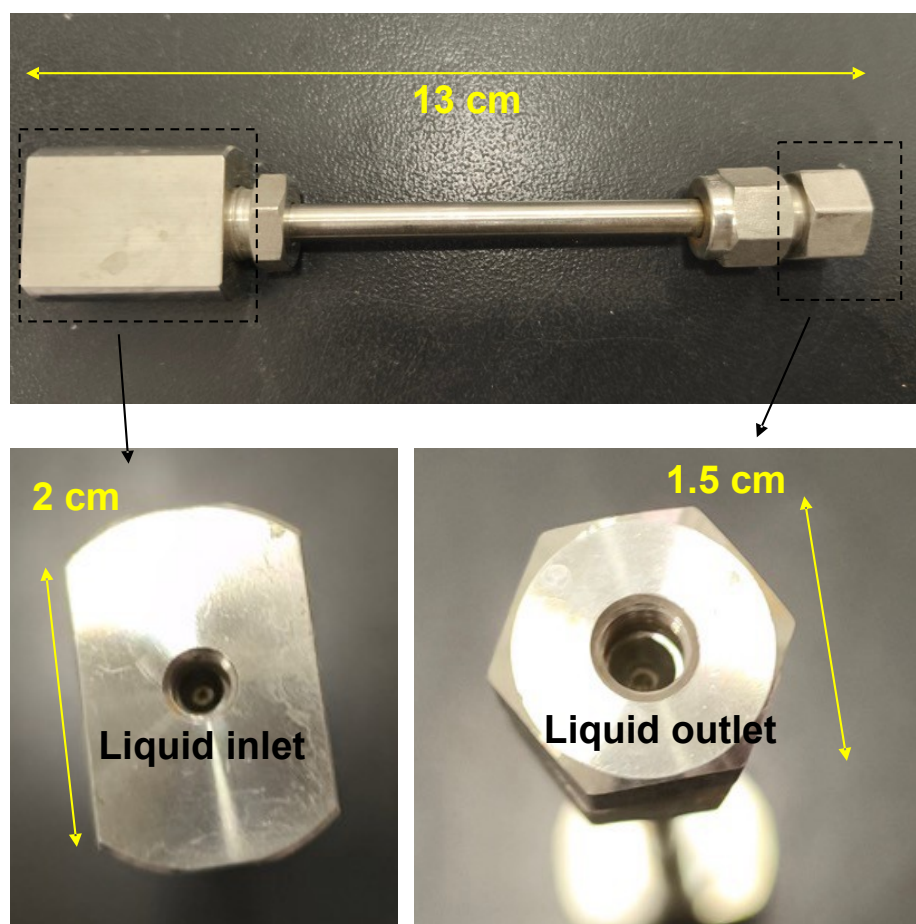

**Figure. S2**

(a) TEM image of CdS:Ag<sup>+</sup> doped-QDs synthesized by batch flask method. (b) Particle size analysis of CdS:Ag<sup>+</sup> doped-QDs synthesized by batch flask method.

**a**

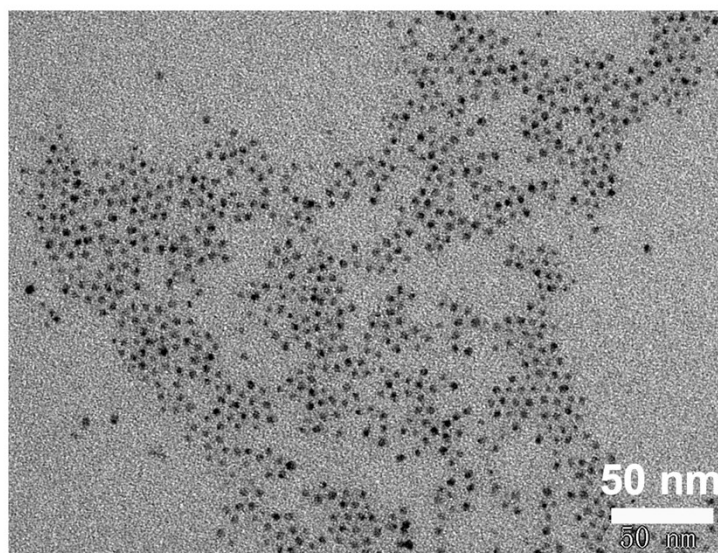

**b**

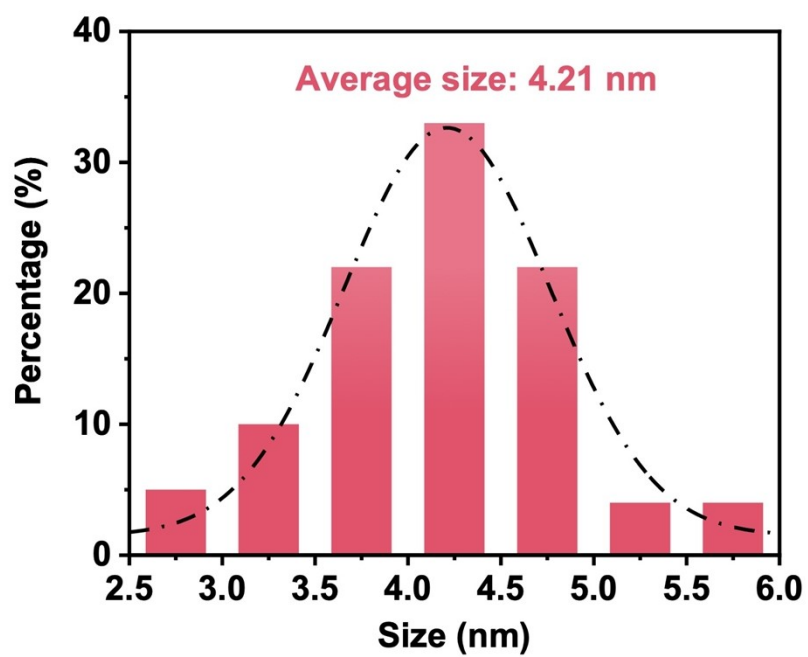

**Figure. S3**

HRTEM image of CdS:Ag<sup>+</sup> doped-QDs synthesized by MPB system.

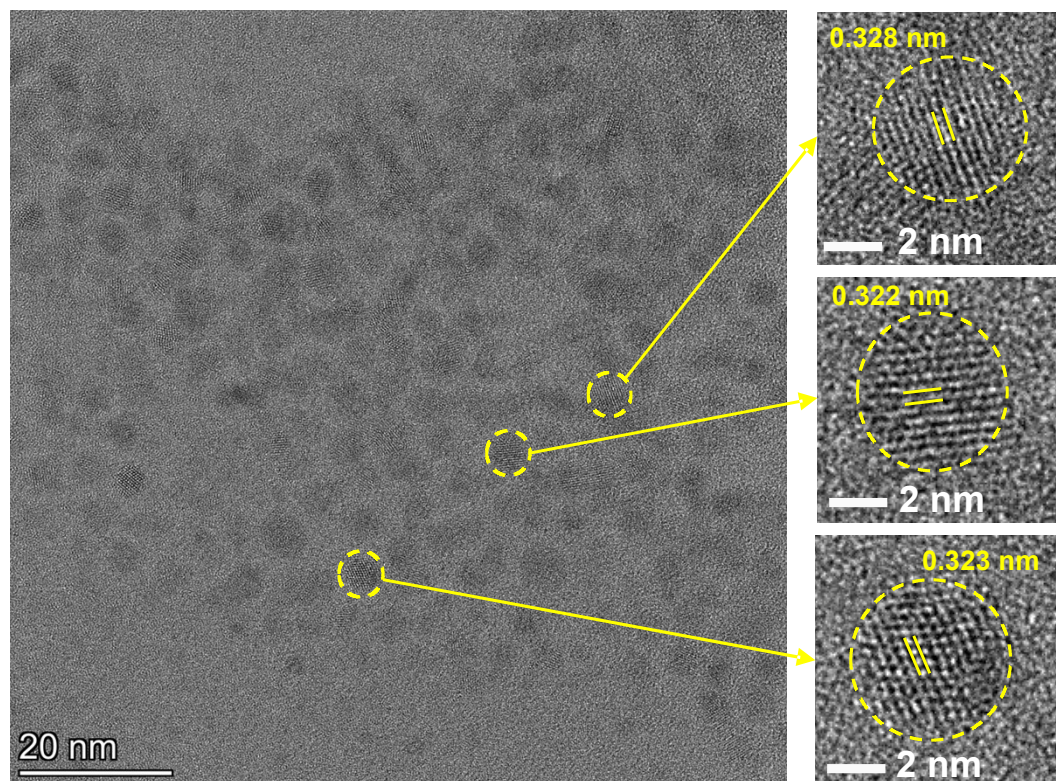

**Table. S1**

The EDS elemental content of CdS:Ag<sup>+</sup> doped-QDs synthesized by MPB system.

| Element | Family | Atomic<br>Fraction (%) | Atomic<br>Error (%) | Mass<br>Fraction (%) | Mass<br>Error (%) | Fit error<br>(%) |
|---------|--------|------------------------|---------------------|----------------------|-------------------|------------------|
| S       | K      | 58.03                  | 34.47               | 28.30                | 12.91             | 36.17            |
| Ag      | L      | 1.06                   | 10.18               | 1.74                 | 16.70             | 975.80           |
| Cd      | L      | 40.91                  | 22.45               | 69.96                | 27.66             | 26.04            |

**Table. S2**

The ICP-OES result of CdS:Ag<sup>+</sup> doped-QDs synthesized by MPB system.

| Element | Content (mg/L) | RSD (%) | Mass ratio (%) |
|---------|----------------|---------|----------------|
| Ag      | 19.76          | 1.69    | 3.33           |
| Cd      | 578.43         | 2.16    | 96.67          |

**Figure. S4**

The XRD pattern of CdS:Ag<sup>+</sup> doped-QDs synthesized by MPB and batch flask method.

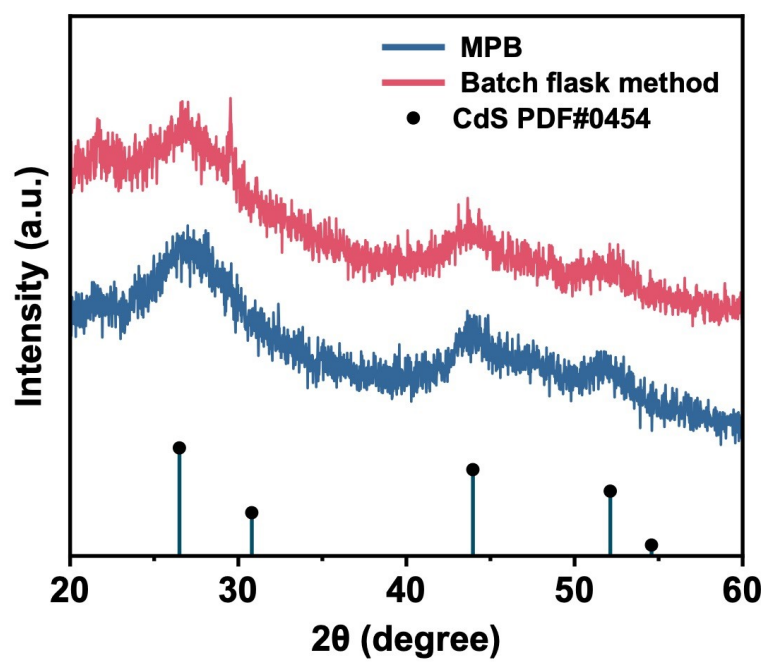



**Figure. S5**

XPS spectra of CdS:Ag<sup>+</sup> doped-QDs prepared by MPB intensified tube microreactor and batch-flask method.

(a) XPS spectra of Ag 3d. (b) XPS spectra of Cd 3d. (c) XPS spectra of S 2p. (d) XPS survey.

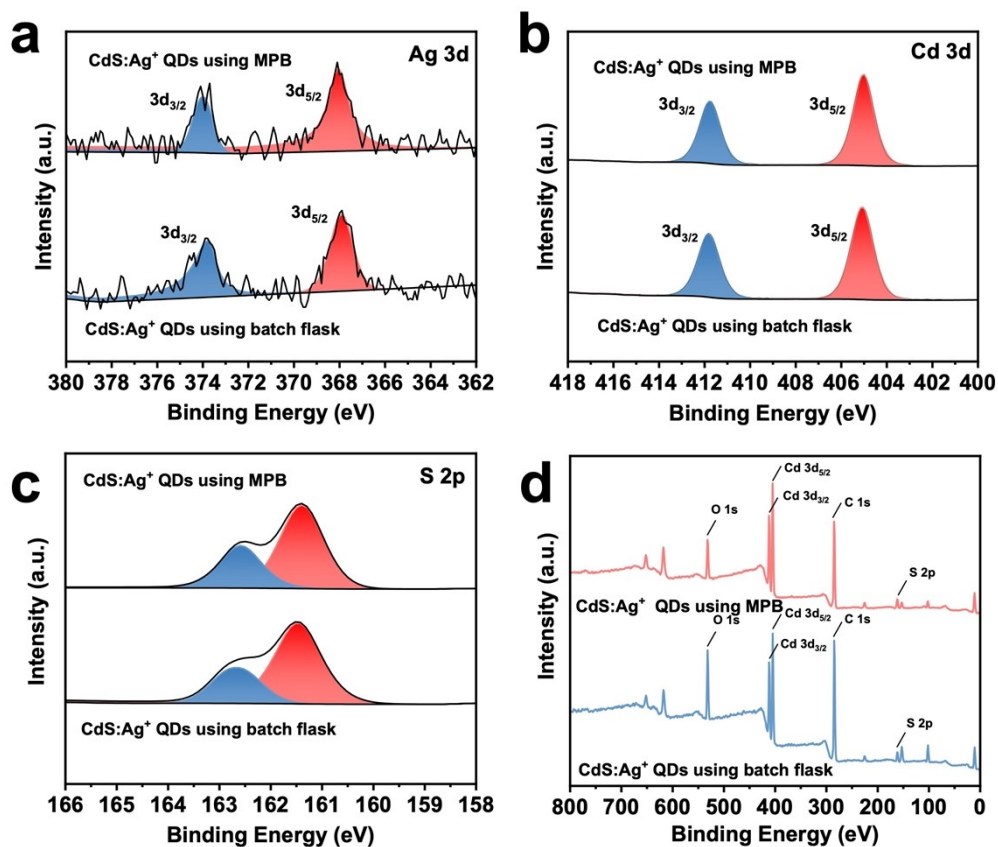

**Figure. S6**

(a) The fluorescence decay curve of CdS:Ag<sup>+</sup> doped-QDs synthesized at 0.033 mol/L TBP, 60 °C and 0.4 mL/min ( $Q_A=Q_B$ ). (b) The fluorescence decay curve of CdS:Ag<sup>+</sup> doped-QDs synthesized at 0.134 mol/L TBP, 60 °C and 0.4 mL/min ( $Q_A=Q_B$ ). (c) Excitation light on reference toluene ( $\lambda_{ex} = 365$  nm) and PL spectrum of CdS:Ag<sup>+</sup> QDs synthesized at 0.033 mol/L TBP for PLQY measurements. (d) Excitation light on reference toluene ( $\lambda_{ex} = 365$  nm) and PL spectrum of CdS:Ag<sup>+</sup> QDs synthesized at 0.134 mol/L TBP for PLQY measurements.

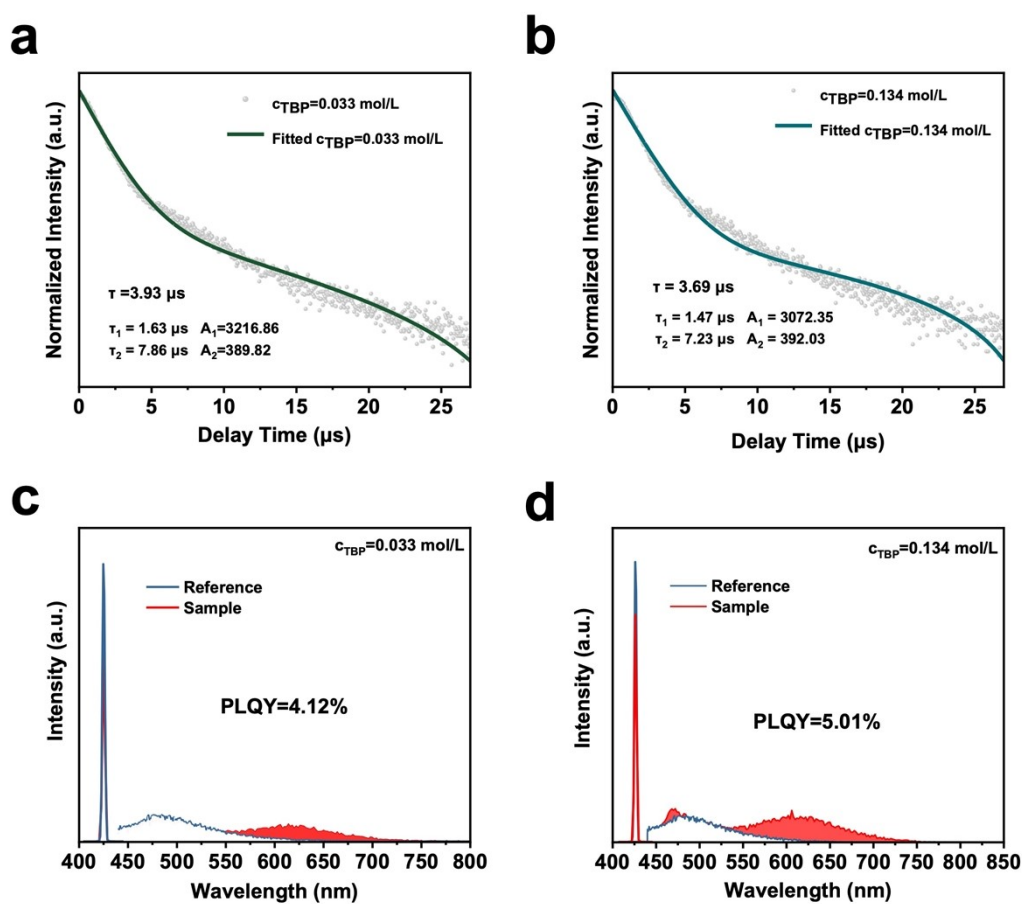



**Figure. S7**

Excitation light on reference toluene ( $\lambda_{\text{ex}} = 365 \text{ nm}$ ) and PL spectrum of CdS:Ag<sup>+</sup> QDs synthesized at different temperature and flow velocity.

(a) Temperature is 60 °C and the flow rate is 0.2 mL/min. (b) Temperature is 70 °C and the flow rate is 0.2 mL/min. (c) Temperature is 60 °C and the flow rate is 0.3 mL/min. (d) Temperature is 70 °C and the flow rate is 0.3 mL/min. (e) Temperature is 60 °C and the flow rate is 0.4 mL/min. (f) Temperature is 70 °C and the flow rate is 0.4 mL/min.

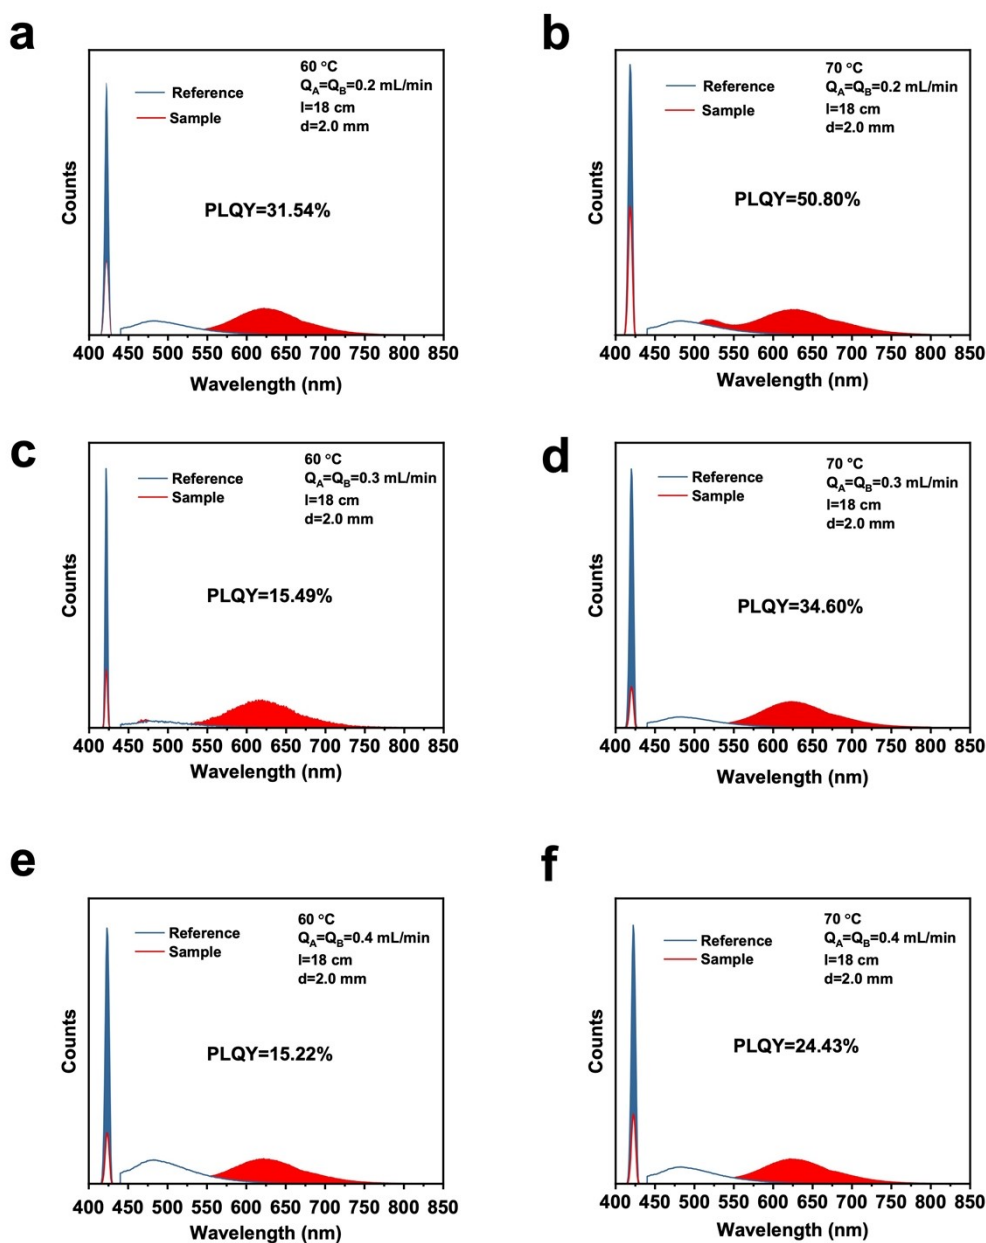

**Figure S8**

PL spectra of CdS:Ag<sup>+</sup> doped-QDs synthesized using batch flask method, MPB and tube microreactor without MPB.

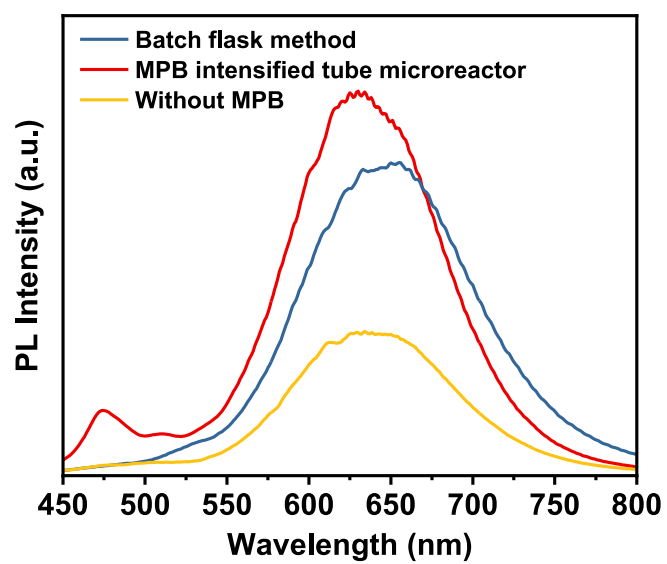

Supplement: d5nr01114k1.pdf [file d5nr01114k1.pdf]
